# Supplementary material
Source: PubMed Central journal article supplement (PMC6813862)

**Supplemental Fig. 3: Effects of the ectopic expression of CA-NFATc1 in WT or RANK<sup>KI/KI</sup> BMMs on osteoclastogenesis in the absence or presence of RANKL**

WT or RANK<sup>KI/KI</sup> (KI) BMMs were plated in 60-mm untreated tissue culture dishes, and infected with retrovirus expressing GFP or the constitutively active form of NFATc1 (CA-NFATc1). 36 hours later, the supernatant was removed and cells were maintained with  $\alpha$ -10 medium containing 200 ng/ml M-CSF for 2 days. Then, cells were lifted by 0.02% EDTA for further analyses. (A) A portion of cells were lysed for the analysis of NFATc1 expression by Western blot. (B) Remaining cells were seeded in 24-well treated plates ( $5 \times 10^4$  cells/well) and treated with M-CSF (40 ng/ml) alone or M-CSF (40 ng/ml) plus RANKL (25, 50, or 100 ng/ml) for 4 days. TRAP staining was performed and images of the whole wells of the osteoclastogenesis assays are shown. (C) A high power view of a representative area in each well in B is shown. Scale bar = 200  $\mu$ m. Quantification of osteoclastogenesis is shown right below the images. The number of multinucleated TRAP-positive cells (>3 nuclei) of five representative view areas in each well (40 $\times$  magnification) was obtained. Data are mean  $\pm$  S.D. of three independent experiments. \*,  $p < 0.05$ ; \*\*,  $p < 0.01$ ; NS, not significant.

For the preparation of retrovirus, the retroviral vector encoding CA-NFATc1 (#11102; Addgene, Cambridge, MA, US) or GFP, together with TurboFect Transfection Reagent (00700372; Thermo Scientific) was transfected into 293GPG packing cells. Then the viral supernatants were harvested three successive 24 hours and filtered for use. The virus infection was carried out using a mixture composed of 3 ml viral supernatant and 1ml  $\alpha$ -20 medium ( $\alpha$ -MEM with 20% heat-inactivated fetal bovine serum) plus 200 ng/ml M-CSF.

### Supplemental figure 3

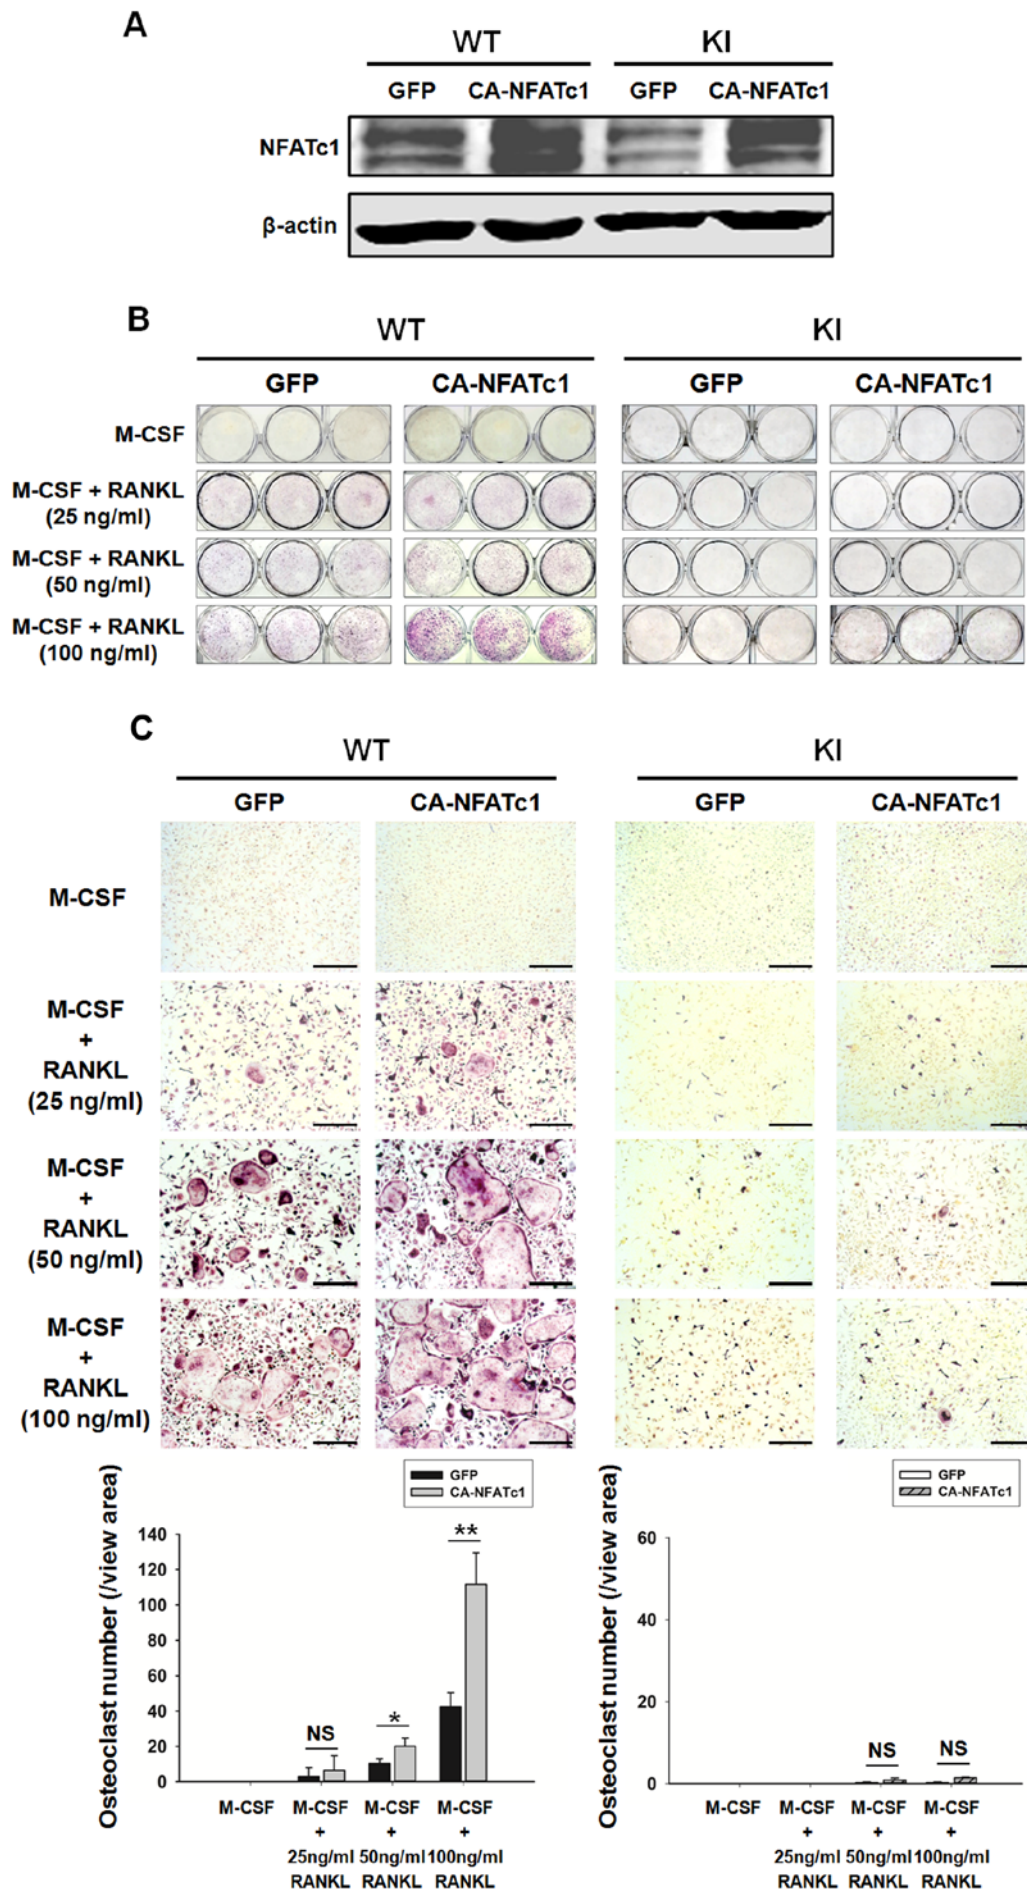

Supplement: NIHMS1034424-supplement-Supp_figS3.pdf [file NIHMS1034424-supplement-Supp_figS3.pdf]
