# Supplementary material
Source: PubMed Central journal article supplement (PMC6813862)

**Supplemental Fig. 4: Development and characterization of CPP conjugated with RANK fragments containing Motif 2 or 3**

(A-B) Schematic of how the CPP conjugates block the activation of RANK Motifs 2 and 3. X and Y are the molecules that bind to Motifs 2 and 3, respectively. These molecules are responsible for downstream signal transduction. M2 and M3 are peptides derived from Motifs 2 and 3, respectively. (C) Structure of the FITC-tagged CPP conjugates. The amino acids (highlighted in red) in the inactive forms of CPP conjugates (iM2-10, iM3-10) are locations where the sequences are mutated. The sequence of CPP (from the transcription factor Hph-1) is shown in the blue box. (D-G) Transduction efficiency of the CPP conjugates in WT BMMs. BMMs isolated from WT mice were incubated with M-CSF (40 ng/ml) on 24-well plates. At different time points, cells were washed with PBS and nuclear staining was then performed using Hoechst 33258. The intracellular fluorescence was analyzed by fluorescence microscopy. Scale bar = 200  $\mu$ m.

**Supplemental figure 4**

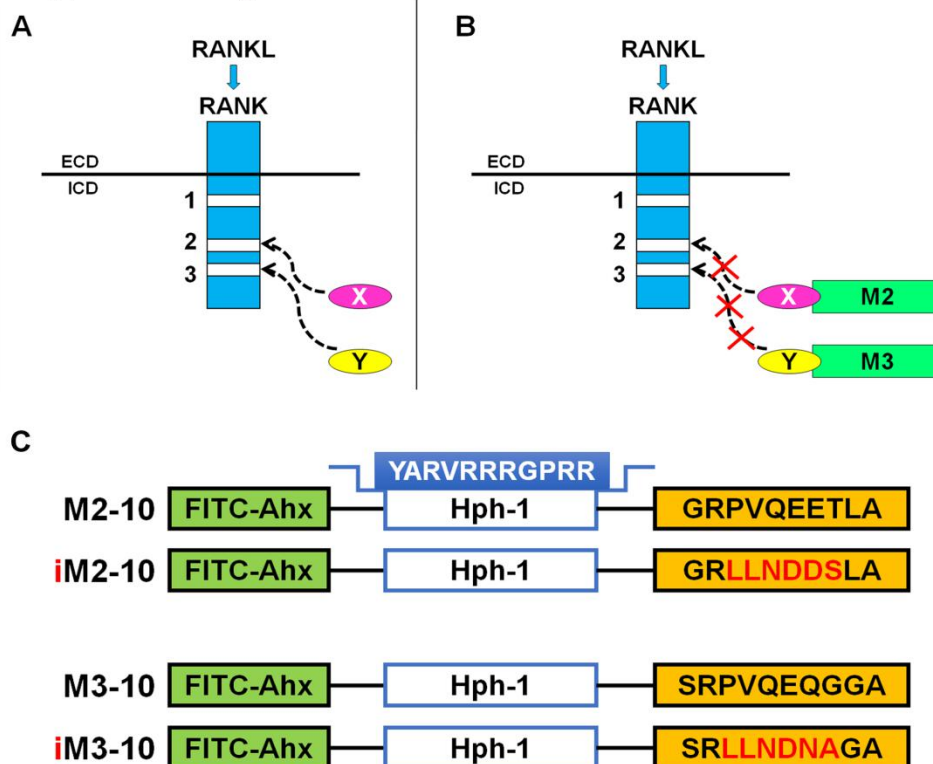

Supplemental figure 4

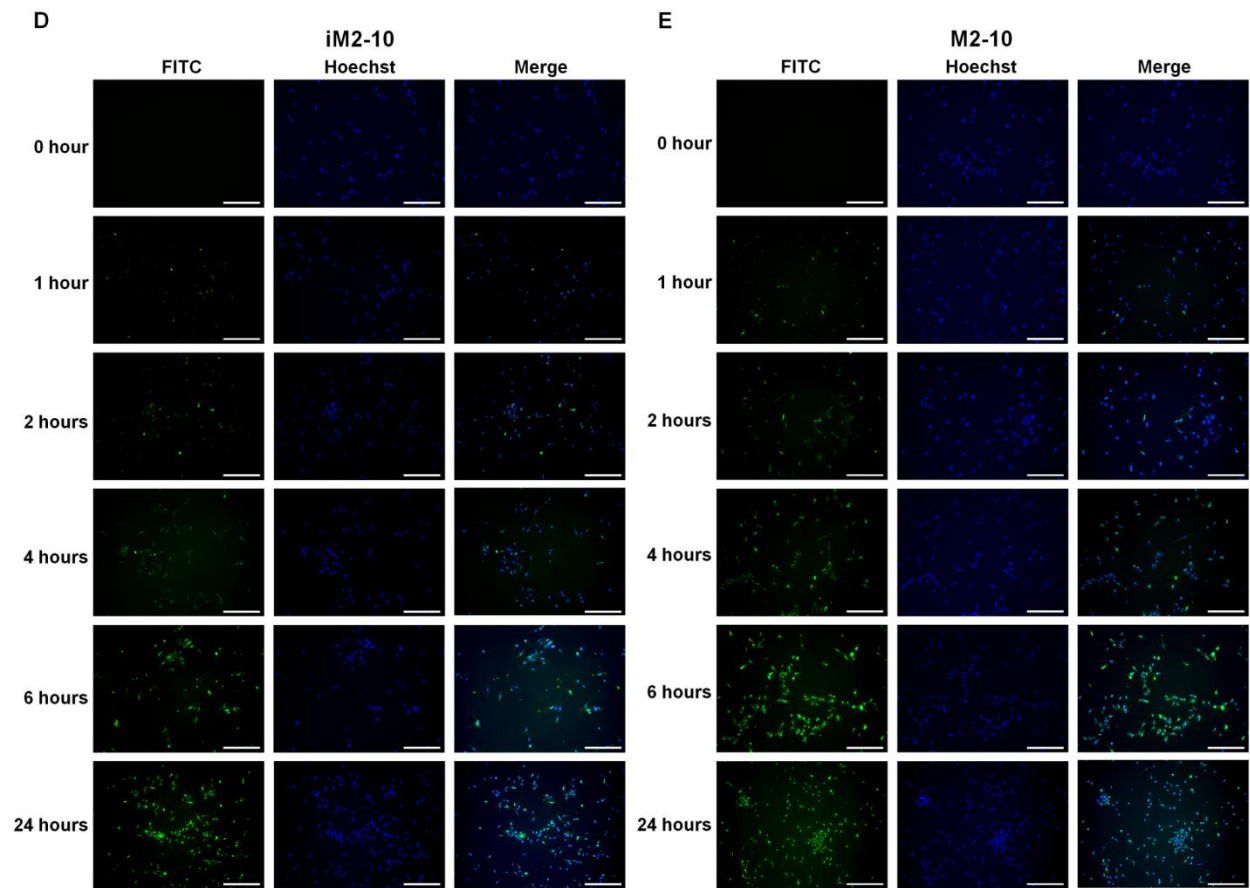

Supplemental figure 4

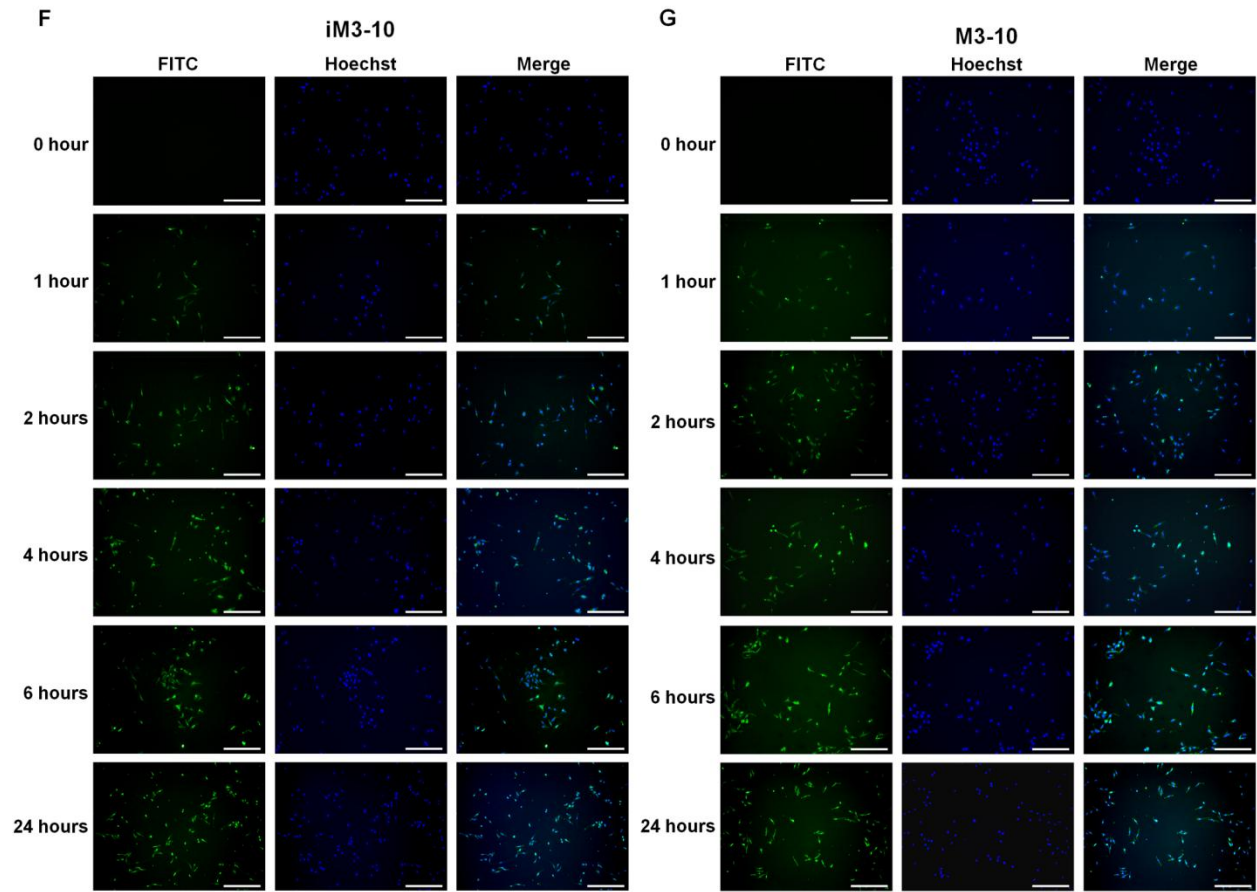

Supplement: NIHMS1034424-supplement-Supp_figS4.pdf [file NIHMS1034424-supplement-Supp_figS4.pdf]
