# Supplementary material
Source: PubMed Central journal article supplement (PMC6813862)

**Supplemental Fig. 5: Development and characterization of CPP conjugates with shorter sequences spanning RANK Motif 2 or 3**

(A-B) Structure of CPP conjugates with 8 or 6 amino acids derived from RANK Motif 2 or 3 (M2-8, iM2-8, M3-8, iM3-8). Mutated amino acids are highlighted in red. (C-D) Osteoclastogenesis assays with M2-8 plus M3-8 or M2-6 plus M3-6. The experimental procedures are similar to those described in Fig. 5. TRAP staining was then performed. Representative areas of the cultures are shown (left panel), and the number of TRAP-positive MNCs was counted (right panel). Scale bar = 500  $\mu$ m. Data are expressed as mean  $\pm$  S.D. of three independent experiments. \*,  $p < 0.05$ ; \*\*,  $p < 0.01$ ; \*\*\*,  $p < 0.001$ .

**Supplemental figure 5**

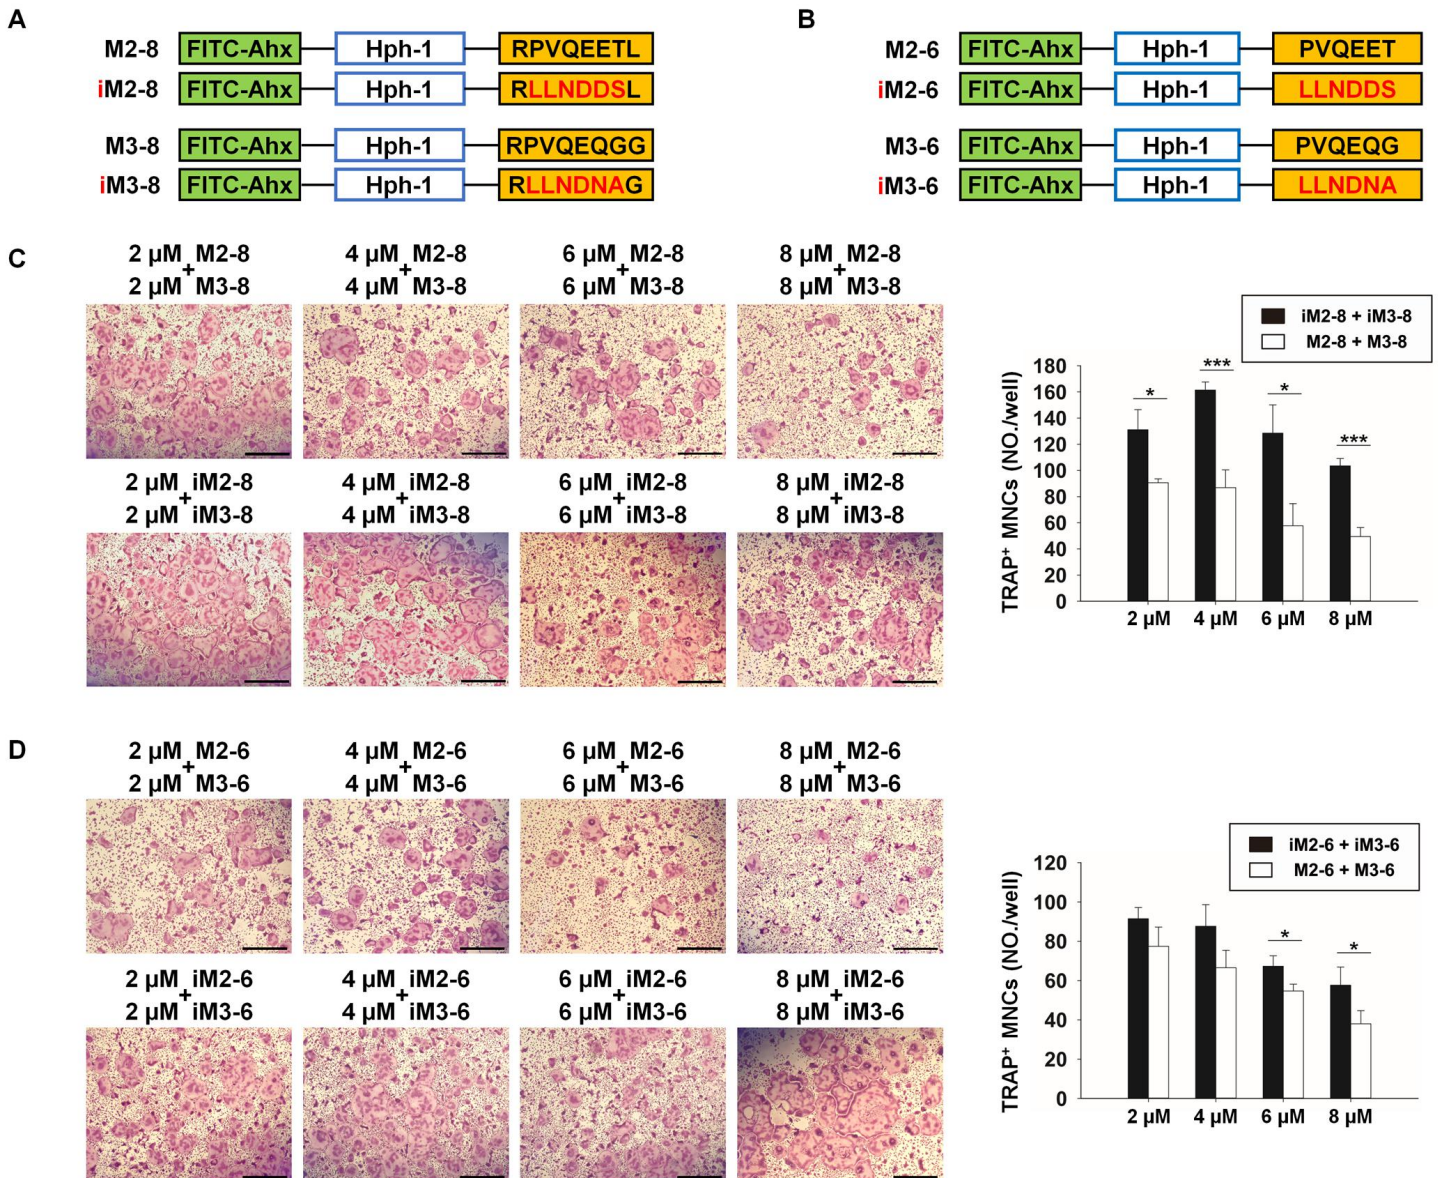

Supplement: NIHMS1034424-supplement-Supp_figS5.pdf [file NIHMS1034424-supplement-Supp_figS5.pdf]
